# Supplementary material
Source: PubMed Central journal article supplement (PMC4282505)

**Figure 2**

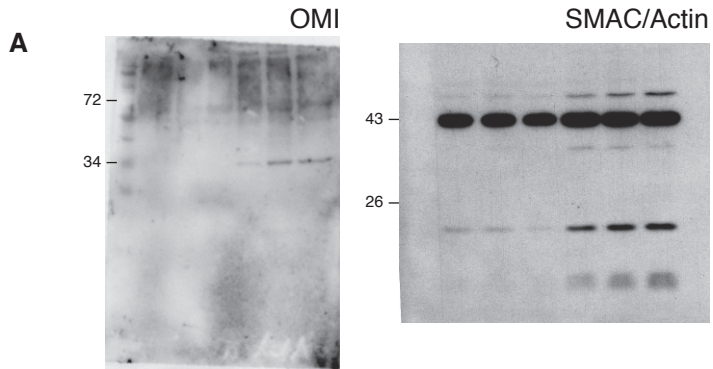

Supplement: embj0033-2171-sd3.pdf [file embj0033-2171-sd3.pdf]

**Figure 3**

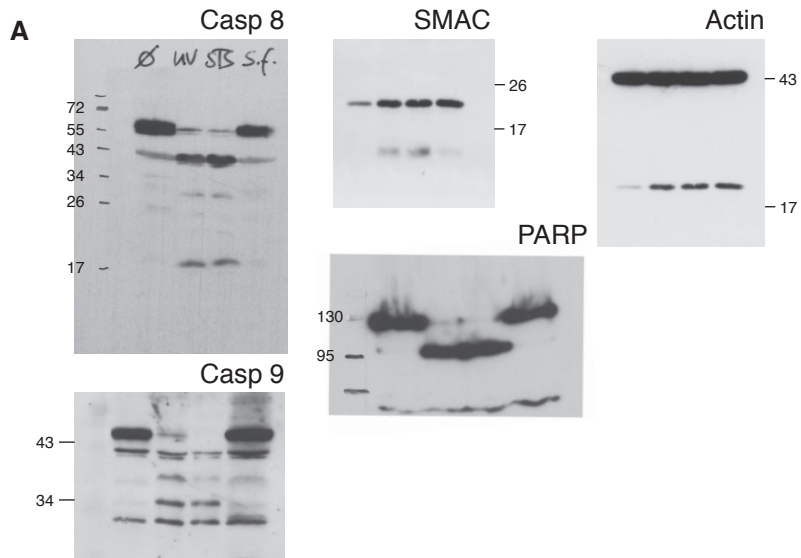

Supplement: embj0033-2171-sd4.pdf [file embj0033-2171-sd4.pdf]

**Figure 4**

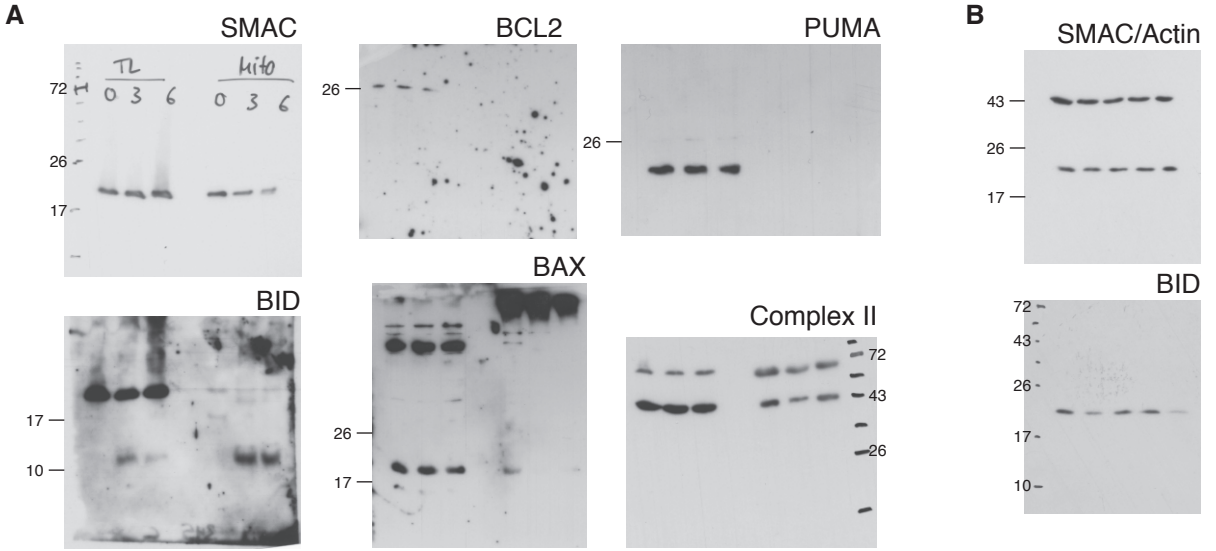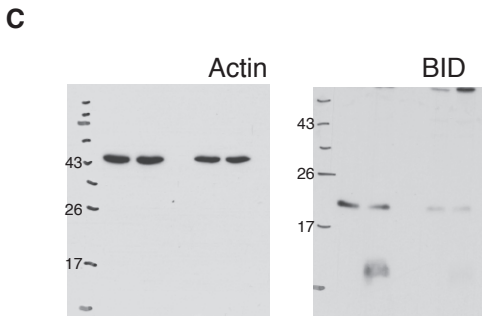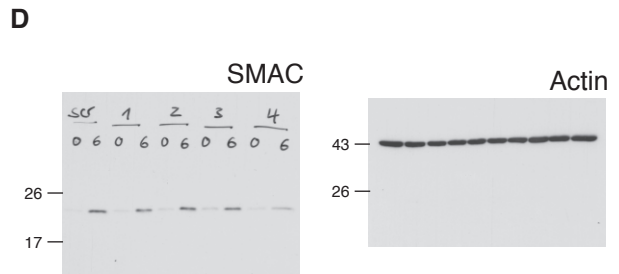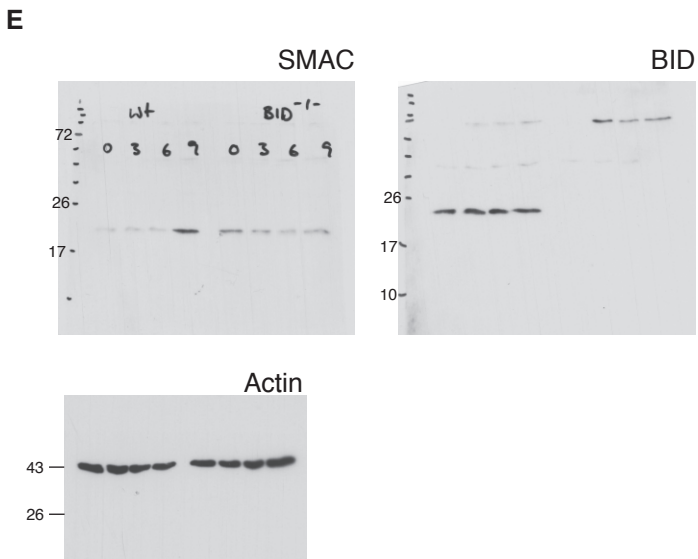

Supplement: embj0033-2171-sd5.pdf [file embj0033-2171-sd5.pdf]

**Figure 6**

**B**

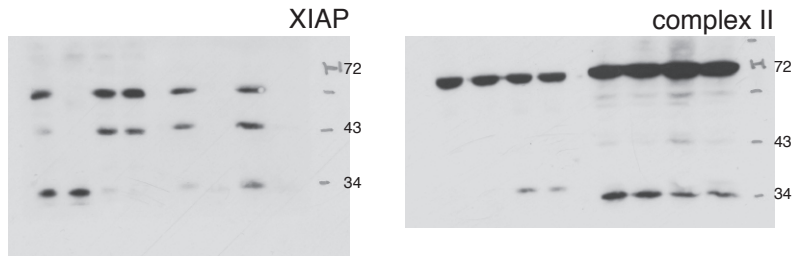

Supplement: embj0033-2171-sd7.pdf [file embj0033-2171-sd7.pdf]
